# Supplementary material
Source: PubMed Central journal article supplement (PMC4287830)
Supplement: ac503803m_si_001.pdf [file ac503803m_si_001.pdf]

# Simultaneous Detection of Multiple DNA Adducts in Human Lung Samples by Isotope-Dilution

## UPLC-MS/MS

*Bernhard H. Monien, Fabian Schumacher, Kristin Herrmann, Hansruedi Glatt,*

*Robert J. Turesky, Christophe Chesné*

### Supporting Information

- Table S-1 Information about the human lung samples
- Table S-2 Fragmentations of DNA adducts and mass spectrometric parameters of detection
- Table S-3 Recovery of work-up methods
- Table S-4 Ion suppression of DNA adduct signals due to matrix effects
- Figure S-1 Structural representations of DNA adducts available as isotope-labeled internal reference compounds.
- Figure S-2 Chromatograms of quantifier traces from isotope-labeled references DNA adducts
- Figure S-3 UPLC-MS/MS chromatograms of  $N^6$ -MF-dA and [ $^{15}N_5$ ] $N^6$ -MF-dA in digested DNA of human lung # 8
- Figure S-4 UPLC-MS/MS chromatograms of  $N^6$ -MIE-dA and [ $^{15}N_5$ ] $N^6$ -MIE-dA in digested DNA of human lung # 6
- Figure S-5 Correlations between pulmonary adduct levels in first and second analysis

**Table S-1.** Information about human tissue samples.

| <b>sample id</b> | <b>sex</b> | <b>age</b> | <b>reason of surgical intervention</b> | <b>smoking status<sup>a</sup></b> |
|------------------|------------|------------|----------------------------------------|-----------------------------------|
| P1               | m          | 80         | lung tumor                             | cigarette smoker                  |
| P2               | m          | 72         | lung tumor                             | -                                 |
| P3               | m          | 77         | lung tumor                             | -                                 |
| P4               | m          | 74         | lung tumor                             | cigarette smoker                  |
| P5               | f          | 74         | lung tumor                             | non-smoker                        |
| P6               | f          | 64         | lung tumor                             | cigarette smoker                  |
| P7               | f          | 72         | lung tumor                             | -                                 |
| P8               | f          | 55         | lung tumor                             | -                                 |
| P9               | f          | 50         | lung tumor                             | -                                 |
| P10              | f          | 72         | lung tumor                             | -                                 |

<sup>a</sup> The smoking habits were not always reported and pack-years are not known for smokers.

**Table S-2.** Mass spectrometric parameters for the detection of DNA adducts by multiple reaction monitoring. Traces used as quantifier signals are highlighted if multiple transitions were available.

| adduct                                                                                 | transitions |              | collision energy (eV) | Cone voltage (V) |
|----------------------------------------------------------------------------------------|-------------|--------------|-----------------------|------------------|
|                                                                                        | parent ion  | daughter ion |                       |                  |
| 1,N <sup>6</sup> -εdA                                                                  | 276.1       | 160          | 13                    | 15               |
| [ <sup>15</sup> N <sub>5</sub> ]1,N <sup>6</sup> -εdA                                  | 281.1       | 165          | 13                    | 15               |
| 3,N <sup>4</sup> -εdC                                                                  | 252.1       | 136          | 13                    | 15               |
| [ <sup>15</sup> N <sub>3</sub> ]3,N <sup>4</sup> -εdC                                  | 255.1       | 139          | 13                    | 15               |
| M1dG                                                                                   | 304.1       | 188          | 10                    | 13               |
| [ <sup>15</sup> N <sub>3</sub> ]M1dG                                                   | 307.1       | 191          | 10                    | 13               |
| N <sup>2</sup> -FFM-dG                                                                 | 376.1       | 109          | 15                    | 32               |
|                                                                                        | 376.1       | 260.1        | 15                    | 12               |
| [ <sup>15</sup> N <sub>5</sub> , <sup>13</sup> C <sub>10</sub> ]N <sup>2</sup> -FFM-dG | 391.1       | 109          | 15                    | 32               |
|                                                                                        | 391.1       | 270.1        | 15                    | 12               |
| N <sup>6</sup> -FFM-dA                                                                 | 360.1       | 109          | 25                    | 35               |
|                                                                                        | 360.1       | 148          | 25                    | 25               |
|                                                                                        | 360.1       | 244.1        | 25                    | 15               |
| [ <sup>15</sup> N <sub>5</sub> ]N <sup>6</sup> -FFM-dA                                 | 365.1       | 109          | 25                    | 35               |
|                                                                                        | 365.1       | 153          | 25                    | 25               |
|                                                                                        | 365.1       | 249.1        | 25                    | 15               |
| N <sup>2</sup> -MF-dG                                                                  | 348.1       | 81.1         | 17                    | 37               |
|                                                                                        | 348.1       | 164          | 17                    | 25               |
|                                                                                        | 348.1       | 232          | 17                    | 12               |
| [ <sup>15</sup> N <sub>5</sub> , <sup>13</sup> C <sub>10</sub> ]N <sup>2</sup> -MF-dG  | 363.1       | 81.1         | 17                    | 37               |
|                                                                                        | 363.1       | 174          | 17                    | 25               |
|                                                                                        | 363.1       | 242          | 17                    | 12               |
| N <sup>6</sup> -MF-dA                                                                  | 332.1       | 81.1         | 27                    | 35               |
|                                                                                        | 332.1       | 148.1        | 27                    | 25               |
|                                                                                        | 332.1       | 216.1        | 27                    | 15               |
| [ <sup>15</sup> N <sub>5</sub> ]N <sup>6</sup> -MF-dA                                  | 337.1       | 81.1         | 27                    | 35               |
|                                                                                        | 337.1       | 153.1        | 27                    | 25               |
|                                                                                        | 337.1       | 221.1        | 27                    | 15               |
| N <sup>2</sup> -MIE-dG                                                                 | 444.1       | 164.1        | 22                    | 27               |
|                                                                                        | 444.1       | 177.1        | 22                    | 27               |
|                                                                                        | 444.1       | 328.1        | 22                    | 11               |
| [ <sup>15</sup> N <sub>5</sub> ]N <sup>2</sup> -MIE-dG                                 | 449.1       | 169.1        | 22                    | 27               |
|                                                                                        | 449.1       | 177.1        | 22                    | 27               |
|                                                                                        | 449.1       | 333.1        | 22                    | 11               |
| N <sup>6</sup> -MIE-dA                                                                 | 428.1       | 146.1        | 33                    | 44               |
|                                                                                        | 428.1       | 177.2        | 33                    | 28               |
|                                                                                        | 428.1       | 312.1        | 33                    | 18               |
| [ <sup>15</sup> N <sub>5</sub> ]N <sup>6</sup> -MIE-dA                                 | 433.1       | 146.1        | 33                    | 44               |

|                                      |       |       |    |    |
|--------------------------------------|-------|-------|----|----|
|                                      | 433.1 | 177.2 | 33 | 28 |
|                                      | 433.1 | 317.1 | 33 | 18 |
| $N^2$ -1MIM-dG                       | 427.1 | 145.1 | 20 | 43 |
|                                      | 427.1 | 160.1 | 20 | 23 |
| $[^{15}N_5]N^2$ -1MIM-dG             | 427.1 | 311.1 | 20 | 11 |
|                                      | 432.1 | 145.1 | 20 | 43 |
|                                      | 432.1 | 160.1 | 20 | 23 |
|                                      | 432.1 | 316.1 | 20 | 11 |
| $N^6$ -1MIM-dA                       | 411.1 | 145.1 | 29 | 40 |
|                                      | 411.1 | 160.1 | 29 | 23 |
| $[^{15}N_5]N^6$ -1MIM-dA             | 411.1 | 295.1 | 29 | 15 |
|                                      | 416.1 | 145.1 | 29 | 40 |
|                                      | 416.1 | 160.1 | 29 | 23 |
|                                      | 416.1 | 300.1 | 29 | 15 |
| C8-PhIP-dG                           | 490.1 | 250.1 | 35 | 55 |
|                                      | 490.1 | 374.1 | 35 | 25 |
| $[^{15}N_5, ^{13}C_{10}]$ C8-PhIP-dG | 505.1 | 252.1 | 35 | 55 |
|                                      | 505.1 | 384.1 | 35 | 25 |
| C8-ABP-dG                            | 435.2 | 210   | 23 | 50 |
|                                      | 435.2 | 319.1 | 23 | 18 |
| $[^{13}C_{10}]$ C8-ABP-dG            | 445.2 | 210   | 23 | 50 |
|                                      | 445.2 | 324.1 | 23 | 18 |
| $N^2$ -BPDE-dG                       | 570.3 | 152   | 25 | 35 |
|                                      | 570.3 | 257.1 | 25 | 35 |
| $[^2H_7]N^2$ -BPDE-dG                | 570.3 | 454.1 | 25 | 10 |
|                                      | 577.3 | 152   | 25 | 35 |
|                                      | 577.3 | 264.1 | 25 | 35 |
|                                      | 577.3 | 461.1 | 25 | 10 |
| $N^2$ -MP-dG                         | 482.1 | 215.1 | 20 | 45 |
|                                      | 482.1 | 366.1 | 20 | 10 |
| $[^{15}N_5, ^{13}C_{10}]N^2$ -MP-dG  | 497.1 | 215.1 | 20 | 45 |
|                                      | 497.1 | 376.1 | 20 | 10 |
| $N^6$ -MP-dA                         | 466.2 | 215.1 | 30 | 35 |
|                                      | 466.2 | 350.1 | 30 | 20 |
| $[^{15}N_5]N^6$ -MP-dA               | 471.2 | 215.1 | 30 | 35 |
|                                      | 471.2 | 355.1 | 30 | 20 |

**Table S-3.** Recovery values of different extraction methods for DNA adduct enrichment.

| adduct                                                | recovery $R_{M,Ad}$ (%) <sup>a</sup> |                           |                      |                        |
|-------------------------------------------------------|--------------------------------------|---------------------------|----------------------|------------------------|
|                                                       | extraction with methanol             | extraction with 1-butanol | SPE with C18 columns | SPE with Oasis columns |
| 1, <i>N</i> <sup>6</sup> - $\epsilon$ dA              | 86.3                                 | 49.1                      | 84.2                 | 95.8                   |
| 3, <i>N</i> <sup>4</sup> - $\epsilon$ dC <sup>b</sup> | -                                    | -                         | -                    | -                      |
| M1dG                                                  | 88.4                                 | 73.1                      | 101.1                | 33.0                   |
| <i>N</i> <sup>2</sup> -FFM-dG                         | 105.3                                | 66.4                      | 88.3                 | 93.8                   |
| <i>N</i> <sup>6</sup> -FFM-dA                         | 95.2                                 | 91.4                      | 101.8                | 79.4                   |
| <i>N</i> <sup>2</sup> -MF-dG                          | 99.7                                 | 71.5                      | 96.4                 | 91.8                   |
| <i>N</i> <sup>6</sup> -MF-dA                          | 50.4                                 | 49.4                      | 60.4                 | 53.9                   |
| <i>N</i> <sup>2</sup> -MIE-dG                         | 87.4                                 | 72.9                      | 89.6                 | 88.9                   |
| <i>N</i> <sup>6</sup> -MIE-dA                         | 76.8                                 | 59.5                      | 87.6                 | 91.3                   |
| <i>N</i> <sup>2</sup> -1MIM-dG                        | 84.9                                 | 56.2                      | 74.1                 | 78.4                   |
| <i>N</i> <sup>6</sup> -1MIM-dA                        | 44.1                                 | 65.1                      | 77.8                 | 70.8                   |
| C8-PhIP-dG                                            | 89.0                                 | 44.6                      | 2.1                  | 18.2                   |
| C8-ABP-dG                                             | 57.1                                 | 35.3                      | 53.4                 | 60.6                   |
| <i>N</i> <sup>2</sup> -BPDE-dG                        | 79.1                                 | 84.0                      | 71.7                 | 58.2                   |
| <i>N</i> <sup>2</sup> -MP-dG                          | 86.9                                 | 69.2                      | 54.1                 | 77.2                   |
| <i>N</i> <sup>6</sup> -MP-dA                          | 12.2                                 | 10.0                      | 8.2                  | 25.5                   |

*a* The  $R_{M,Ad}$  values were determined as follows. Five samples of 350  $\mu$ g commercially available DNA were spiked with a mix of isotope-labeled reference substances of the DNA adducts, subjected to enzymatic hydrolysis and processed by one of the work-up methods. The internal standards were analyzed by UPLC-MS/MS and the mean peak areas  $\bar{A}_1$  of the quantifier signals were determined. In a second set of five samples, we analyzed the internal standards mixed with the residuals of DNA digests, which were subjected to one of the extraction methods ( $\bar{A}_2$ ). The relative signal loss of a specific analyte due to the extraction procedure was calculated ( $R_{M,Ad} = \bar{A}_1/\bar{A}_2 \cdot 100$  %). Maximum performance values are highlighted in dark grey whereas second best methods are shaded in light grey.

*b* A sizeable signal in unmodified herring sperm DNA used for this assay co-eluted with the internal standard and prohibited the calculation of  $R_{M,Ad}$  for 3,*N*<sup>4</sup>- $\epsilon$ dC.

**Table S-4.** Effects of DNA residuals from different extraction methods on the UPLC-MS/MS analytical results of DNA adducts.

| adduct                                                | $IS_{M,Ad} (\%)^a$       |                           |                      |                        |
|-------------------------------------------------------|--------------------------|---------------------------|----------------------|------------------------|
|                                                       | extraction with methanol | extraction with 1-butanol | SPE with C18 columns | SPE with OASIS columns |
| 1, <i>N</i> <sup>6</sup> - $\epsilon$ dA              | 9.9                      | 49.6                      | 18.0                 | 94.6                   |
| 3, <i>N</i> <sup>4</sup> - $\epsilon$ dC <sup>b</sup> | -                        | -                         | -                    | -                      |
| M1dG                                                  | 35.3                     | 59.5                      | 62.5                 | 53.2                   |
| <i>N</i> <sup>2</sup> -FFM-dG                         | 31.4                     | 59.5                      | 52.3                 | 65.0                   |
| <i>N</i> <sup>6</sup> -FFM-dA                         | 64.7                     | 101.3                     | 71.1                 | 76.9                   |
| <i>N</i> <sup>2</sup> -MF-dG                          | 22.0                     | 55.0                      | 43.0                 | 60.2                   |
| <i>N</i> <sup>6</sup> -MF-dA                          | 31.1                     | 39.4                      | 36.6                 | 43.2                   |
| <i>N</i> <sup>2</sup> -MIE-dG                         | 59.0                     | 87.5                      | 62.8                 | 85.2                   |
| <i>N</i> <sup>6</sup> -MIE-dA                         | 57.1                     | 81.6                      | 63.3                 | 43.1                   |
| <i>N</i> <sup>2</sup> -1MIM-dG                        | 51.5                     | 66.5                      | 40.8                 | 89.7                   |
| <i>N</i> <sup>6</sup> -1MIM-dA                        | 56.7                     | 71.3                      | 52.6                 | 52.3                   |
| C8-PhIP-dG                                            | 99.7                     | 86.3                      | 95.1                 | 77.2                   |
| C8-ABP-dG                                             | 57.1                     | 90.0                      | 55.7                 | 76.3                   |
| <i>N</i> <sup>2</sup> -BPDE-dG                        | 57.6                     | 94.0                      | 63.6                 | 91.3                   |
| <i>N</i> <sup>2</sup> -MP-dG                          | 58.8                     | 78.9                      | 63.7                 | 70.9                   |
| <i>N</i> <sup>6</sup> -MP-dA                          | 51.2                     | 78.9                      | 53.0                 | 53.8                   |

*a* The  $IS_{M,Ad}$  values were determined as follows. Digests of 350  $\mu$ g commercially available DNA were processed with the work-up methods. The residuals were spiked with the internal reference compounds, which were then analyzed by UPLC-MS/MS. The resulting mean peak areas ( $\bar{A}_1$ ) were compared to those resulting from direct injection of the internal standards ( $\bar{A}_2$ ). The relative signal intensity was calculated ( $IS_{M,Ad} = \bar{A}_1/\bar{A}_2 \cdot 100 \%$ ). Maximum remaining peak areas are highlighted in dark grey whereas second best methods are shaded in light grey.

*b* A sizeable signal in unmodified herring sperm DNA used for this assay co-eluted with the internal standard and prohibited the calculation of  $IS_{M,Ad}$  for 3,*N*<sup>4</sup>- $\epsilon$ dC.

### DNA adducts from lipid peroxidation products

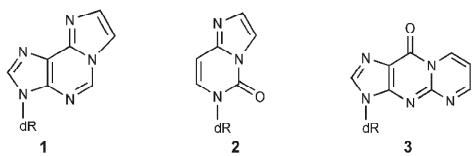

### DNA adducts from plant metabolites

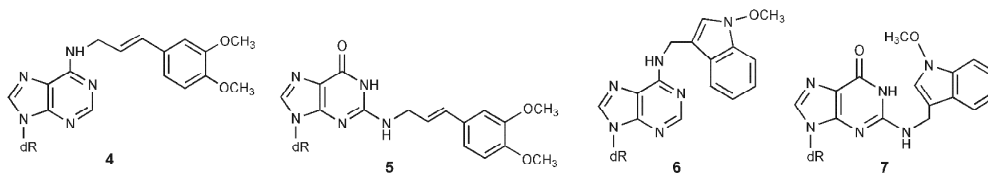

### DNA adducts from food contaminants

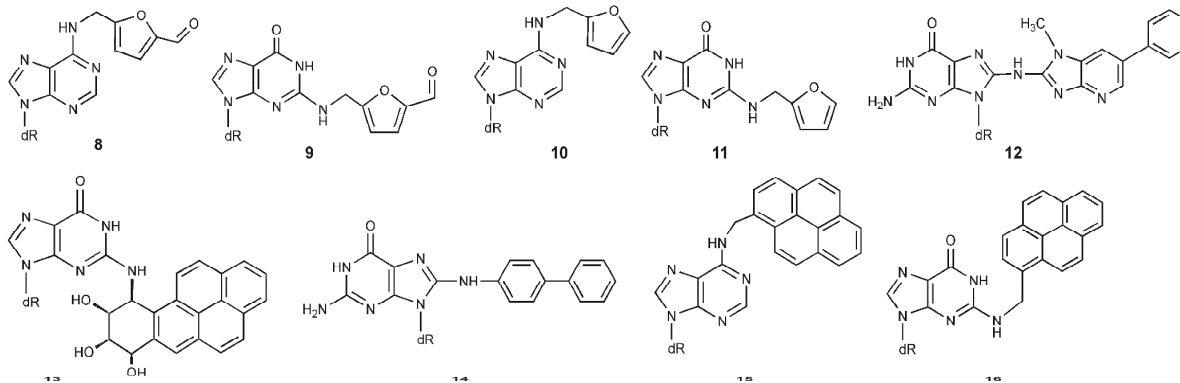

**Figure S-1.** Structural representations of DNA adducts available as isotope-labeled internal reference compounds. The adducts are formed from 1) lipid peroxidation products ( $N^6$ - $\epsilon$ -dA **1**,  $3,N^4$ - $\epsilon$ -dC **2** and M1dG **3**), 2) secondary plant metabolites methyleugenol ( $N^6$ -MIE-dA **4**,  $N^2$ -MIE-dG **5**) and neoglucobrassicin ( $N^6$ -1MIM-dA **6**,  $N^2$ -1MIM-dG **7**), or 3) food contaminants 5-hydroxymethylfurfural ( $N^6$ -FFM-dA **8**,  $N^2$ -FFM-dG **9**), furfuryl alcohol ( $N^6$ -MF-dA **10**,  $N^2$ -MF-dG **11**) the heterocyclic aromatic amine PhIP ( $C8$ -PhIP-dG **12**), benzo[*a*]pyrene ( $N^2$ -BPDE-dG **13**), 4-aminobiphenyl ( $C8$ -ABP-dG **14**) and 1-methylpyrene ( $N^6$ -MP-dA **15**,  $N^2$ -MP-dG **16**).

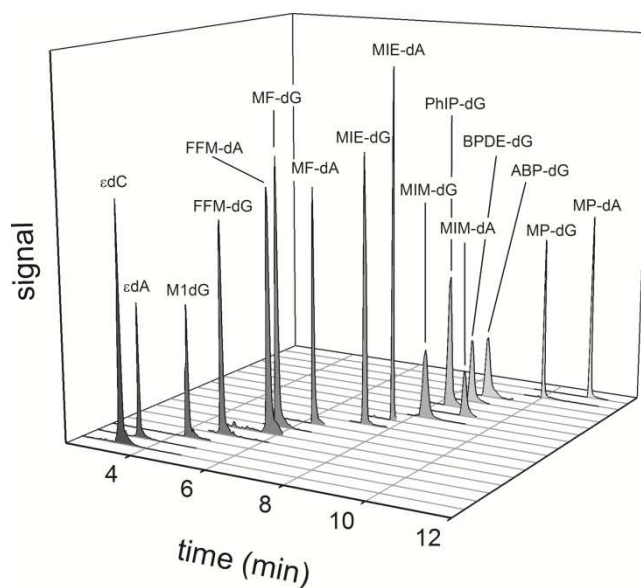

**Figure S-2.** Representative chromatograms of quantifier traces from isotope-labeled internal references of all DNA adducts included in this study. For the sake of clarity peaks are denoted with simplified acronyms omitting atomic positions and the sites of stable isotope labeling. Usually, the signals were recorded from injections of 200 fmol of the adducts on column. Amounts of 1000 fmol were required for comparable signal intensities of [ $^{15}\text{N}_5, ^{13}\text{C}_{10}$ ]C8-PhIP-dG and [ $^2\text{H}_7$ ] $N^2$ -BPDE-dG, whereas only 50 fmol were injected for the peaks of [ $^{15}\text{N}_5$ ]1, $N^6$ - $\epsilon$ dA, [ $^{15}\text{N}_5$ ] $N^6$ -MF-dA and [ $^{15}\text{N}_5$ ] $N^6$ -MP-dA. The broadening of the peaks between 8 and 10 min is a technical artifact. The simultaneous recording of up to 38 fragmentations in this time interval reduced the resolutions, which in turn lead to peak broadening in the smoothing process. The analysis was conducted using water (solvent A) and acetonitrile (solvent B), both of which were acidified with 0.25 % acetic acid and 0.25 % formic acid, as eluents. Thus, retention times deviate from those chromatographic runs presented in the manuscript.



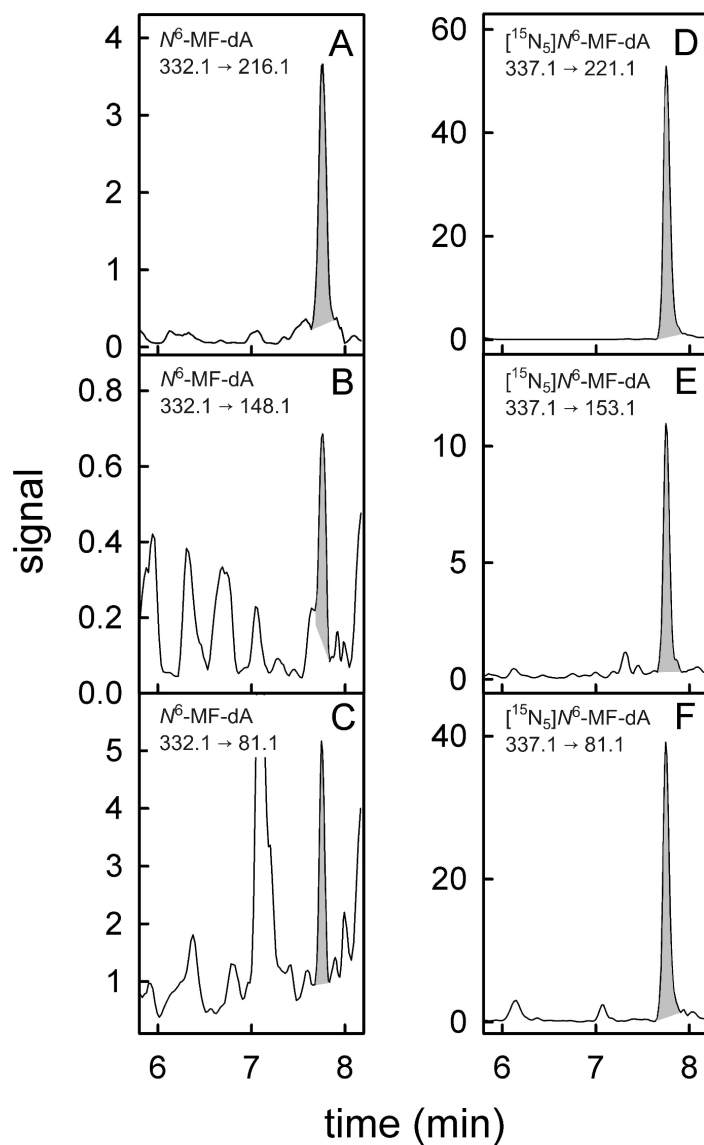

**Figure S-3.** UPLC-MS/MS chromatograms of a digested DNA sample from patient 8 containing  $N^6$ -MF-dA. The left panels depict the chromatograms of  $N^6$ -MF-dA with the fragmentations 332.1  $\rightarrow$  216.1 (A), 332.1  $\rightarrow$  148.1 (B) and 332.1  $\rightarrow$  81.1 (C) that were monitored together with the transitions 337.1  $\rightarrow$  221.1 (D), 337.1  $\rightarrow$  153.1 (E) and 337.1  $\rightarrow$  81.1 (F) of the internal isotope-labeled standard  $[^{15}\text{N}_5]N^6$ -MF-dA. The most intensive signal (332.1  $\rightarrow$  216.1) was used as quantifier signal.

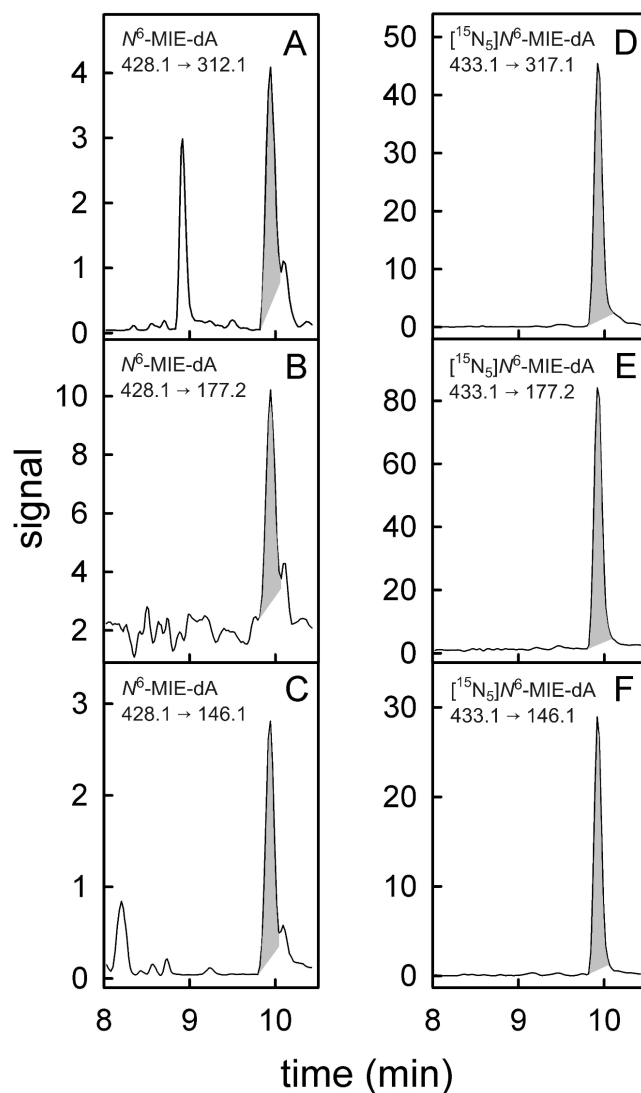

**Figure S-4.** UPLC-MS/MS chromatograms of a digested DNA sample from patient 6 containing the methyleugenol adduct  $N^6$ -MIE-dA. Panels on the left hand side show the chromatograms of  $N^6$ -MIE-dA with the trace 428.1  $\rightarrow$  312.1 (panel A), the quantifier trace 428.1  $\rightarrow$  177.2 (panel B) and the second qualifier trace 428.1  $\rightarrow$  146.1 (panel C). On the right hand side are the parallel recordings of the isotope-labeled standard  $[^{15}\text{N}_5]N^6$ -MIE-dA with the transitions 433.1  $\rightarrow$  317.1 (panel D), 433.1  $\rightarrow$  177.2 (panel E) and 433.1  $\rightarrow$  146.1 (panel F).

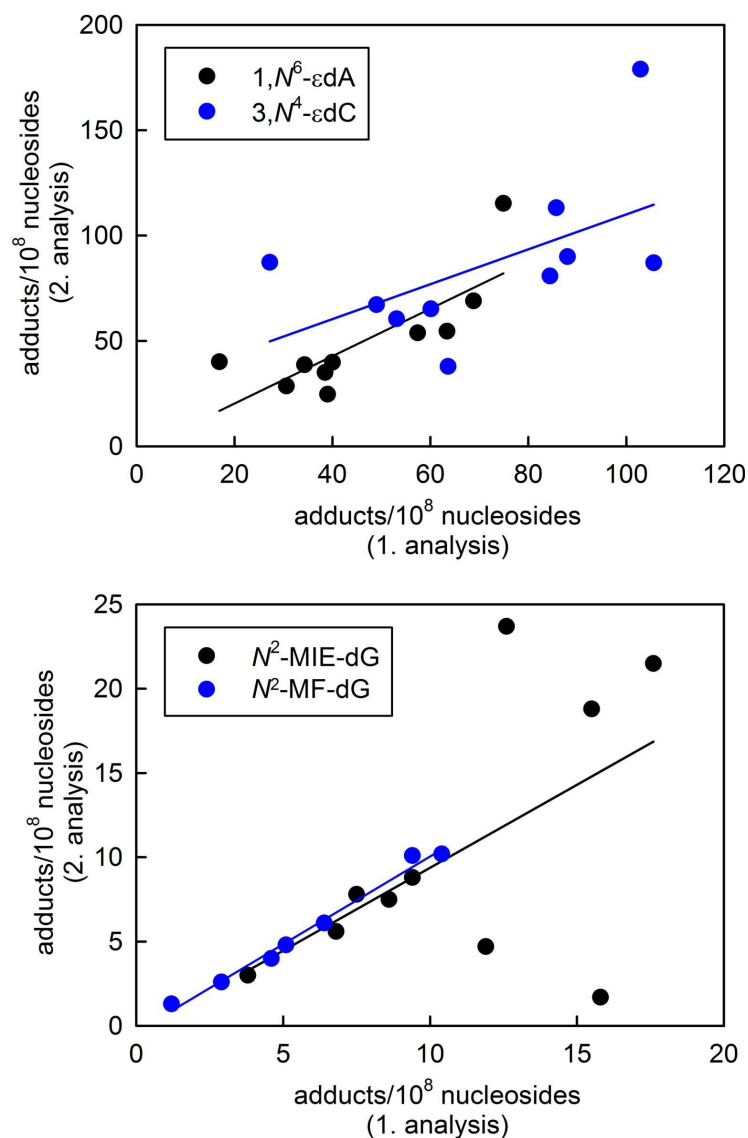

**Figure S-5.** Correlations between DNA adduct levels determined in two independent analyses in ten samples of human lung. Upper panel: 1,N<sup>6</sup>-εdA (black circles,  $m = 1.13$ ,  $r^2 = 0.632$ ) and 3,N<sup>4</sup>-εdC (blue circles,  $m = 0.83$ ,  $r^2 = 0.301$ ), lower panel: N<sup>2</sup>-MIE-dG (black circles,  $m = 0.98$ ,  $r^2 = 0.304$ ) and N<sup>2</sup>-MF-dG (blue circles,  $m = 1.04$ ,  $r^2 = 0.987$ ). Only seven N<sup>2</sup>-MF-dG levels were included, which exceeded the LOD in both analyses.
